# Supplementary material for: Mouse entorhinal cortex encodes a diverse repertoire of self-motion signals
Source: PubMed Central journal article supplement (PMC7844029; doi:10.1038/s41467-021-20936-8), 2021-01-28
Supplement: 41467_2021_20936_MOESM2_ESM.pdf [file 41467_2021_20936_MOESM2_ESM.pdf]

Editorial Note: This manuscript has been previously reviewed at another journal that is not operating a transparent peer review scheme. The manuscript was considered suitable for publication without further review at Nature Communications.
